# Supplementary material for: Off-hour effect is not significant in endovascular treatment for anterior circulation large vessel occlusion in a multicentre registry
Source: PubMed Central journal article supplement — Stroke Vasc Neurol. 2021 Jul 8;6(4):640–8. doi: 10.1136/svn-2021-000949 (PMC8717780; doi:10.1136/svn-2021-000949), 2021-07-08
Supplement: svn-2021-000949supp001.pdf [file svn-2021-000949supp001.pdf]

**Supplemental Table 1.** Demographics and clinical characteristics between the true off-hour group and the true on-hour group

| Variable                        | True off-hour<br>n=394 | True on-hour<br>n=201 | <i>P</i> value |
|---------------------------------|------------------------|-----------------------|----------------|
| Age, year, median (IQR)         | 66.0 (58.0-73.0)       | 67.0 (57.0-75.0)      | 0.449          |
| Male, n (%)                     | 256 (65.0)             | 112 (55.7)            | 0.028          |
| SBP, mmHg, median (IQR)         | 145.0 (130.0-160.0)    | 145.0 (128.0-160.0)   | 0.865          |
| DBP, mmHg, median (IQR)         | 82.0 (76.0-92.0)       | 80.0 (71.0-91.5)      | 0.153          |
| Glucose, mmol/L, median (IQR)   | 6.8 (5.8-8.6)          | 6.4 (5.4-8.5)         | 0.025          |
| Medical history, n (%)          |                        |                       |                |
| Atrial fibrillation             | 168 (42.6)             | 90 (44.8)             | 0.619          |
| Hypertension                    | 256 (65.0)             | 130 (64.7)            | 0.943          |
| Diabetes                        | 74 (18.8)              | 37 (18.4)             | 0.912          |
| Current Smoking, n (%)          | 115 (29.2)             | 45 (22.4)             | 0.077          |
| ASPECTS, median (IQR)           | 9.0 (8.0-10.0)         | 9.0 (8.0-10.0)        | 0.770          |
| Baseline NIHSS, median (IQR)    | 16.0 (12.0-20.0)       | 17.0 (13.0-21.0)      | 0.069          |
| Intravenous thrombolysis, n (%) | 136 (34.5)             | 54 (26.9)             | 0.058          |
| Local anesthesia, n (%)         | 326 (82.7)             | 155 (77.1)            | 0.099          |
| Stroke etiology, n (%)          |                        |                       | 0.867          |
| LAA                             | 167 (42.4)             | 83 (41.3)             |                |
| CE                              | 202 (51.3)             | 103 (51.2)            |                |
| Others                          | 25 (6.3)               | 15 (7.5)              |                |
| ICA occlusion, n (%)            | 164 (41.6)             | 84 (41.8)             | 0.969          |
| MCA occlusion, n (%)            | 226 (57.4)             | 116 (57.7)            | 0.935          |
| ASITN/SIR 0-1, n (%)            | 199 (50.5)             | 90 (44.8)             | 0.186          |

Abbreviations: IQR, interquartile range; SBP, systolic blood pressure; DBP, diastolic blood pressure; ASPECTS, Alberta Stroke Program Early CT Score; NIHSS, National Institute of Health Stroke Scale; LAA, large-artery atherosclerosis; CE, cardioembolism; ICA, intracranial artery; MCA, middle cerebral artery; ASITN/SIR, American Society of Interventional and Therapeutic Neuroradiology/Society of Interventional Radiology.
